# Supplementary material for: Stimuli-responsive circularly polarized luminescence with chiroptical amplification and inversion enabled by cholesterically assembled bio-materials
Source: Royal Society of Chemistry journal article supplement (doi:10.1039/d4tc00071d), 2024-01-01
Supplement: d4tc00071d1.pdf [file d4tc00071d1.pdf]

*Supporting information*

*for*

**Stimuli-Responsive Circularly Polarized Luminescence with Chiroptical  
Amplification and Inversion Enabled by Cholesteric Assembled Bio-materials**

Qing Miao<sup>a</sup>, Xi Wang<sup>a</sup>, Bowen Jin<sup>a</sup>, Yang Chen<sup>a</sup>, Yi Zhou<sup>b</sup>, Rui Xiong<sup>b</sup>, Xiao Meng<sup>a,\*</sup>, Chunhong Ye<sup>a,\*</sup>

a. School of Physical Science and Technology, Shanghai Tech University, Shanghai 201210, China

Email: yechh@shanghaitech.edu.cn, mengxiao@shanghaitech.edu.cn

b. State Key Laboratory of Polymer Materials Engineering, Polymer Research Institute of Sichuan University, Chengdu, 610065 China

## Figures

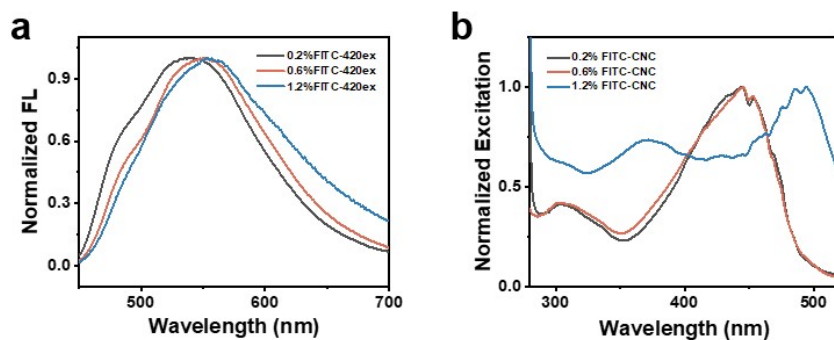

**Figure S1.** Fluorescence (excitation: 420 nm) and excitation (emission: 550 nm) of CNC-FITC with different concentration.

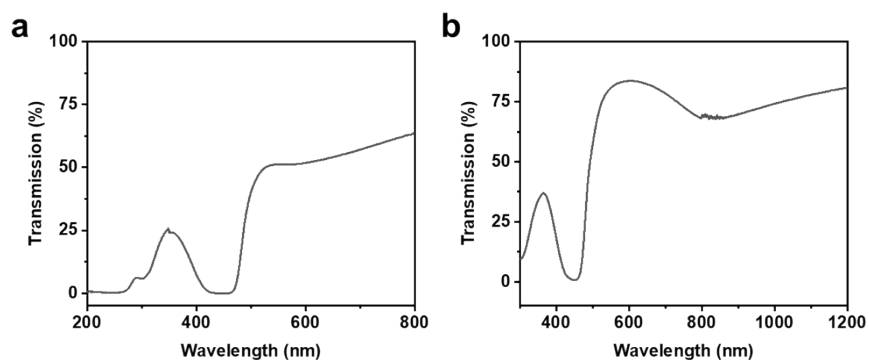

**Figure S2.** Transmission spectra of CNC-FITC-640 (a) and CNC-FITC-900 (b).

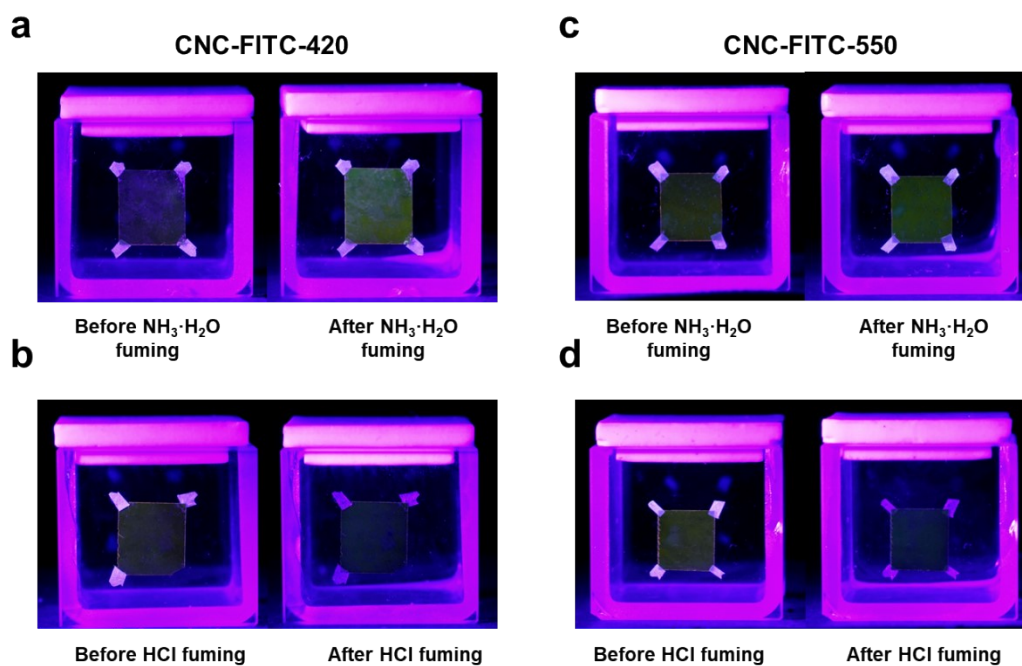

**Figure S3.** Photographs of the in-situ fluorescence intensity changes of the CNC-FITC- 420 (a, b) and 550 (c,d) under acid and alkaline conditions with UV irradiation.

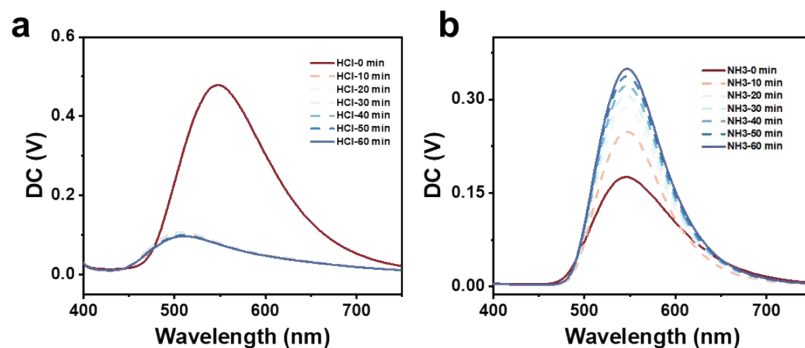

**Figure S4.** Fluorescence spectra of CNC-FITC-420 under acidic (a) and alkaline (b) vapor fuming.

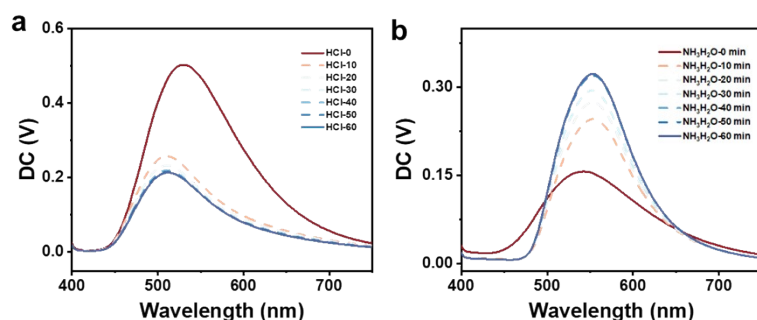

**Figure S5.** Fluorescence spectra of the CNC-FITC-550 film under acidic (a) and alkaline (b) vapor fuming characterized through CPL spectrophotometer (JASCO CPL-300).

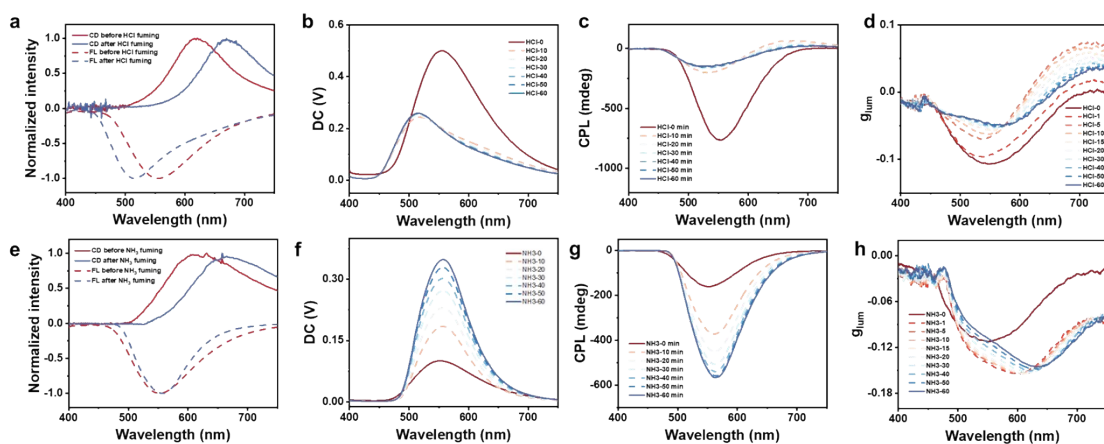

**Figure S6.** Normalized emission spectra (a), emission spectra (b), CPL (c) and  $g_{lum}$ -factor (d) of

CNC-FITC-630 at different time under HCl fuming. Normalized emission spectra (e), emission spectra (f), CPL (g) and  $g_{lum}$ -factor (h) of CNC-FITC-630 at different time under  $NH_3 \cdot H_2O$  fuming.

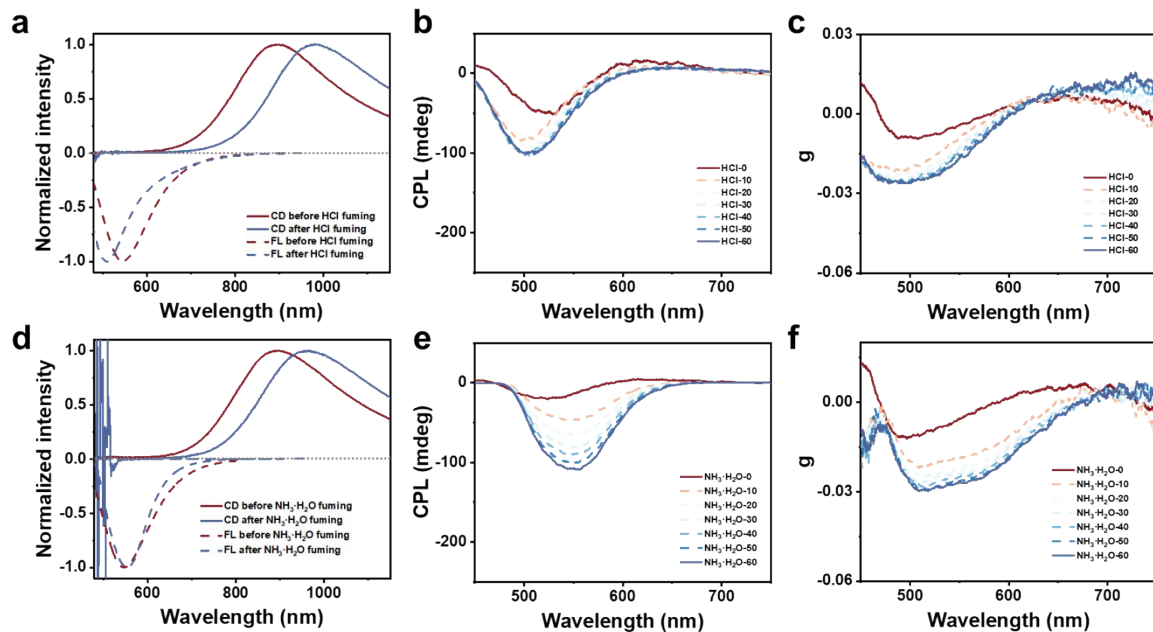

**Figure S7.** Normalized CD spectra and emission spectra (a), CPL (b) and  $g_{lum}$ -factor (c) of CNC-FITC-900 at different treatment intervals under HCl fuming. Normalized CD and emission spectra (d), CPL (e) and  $g_{lum}$ -factor (f) of CNC-FITC-900 at different treatment intervals under  $NH_3$  fuming.

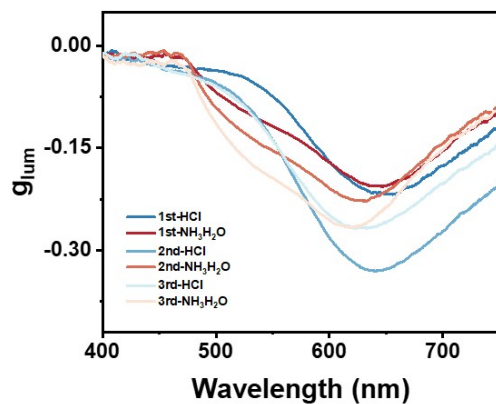

**Figure S8.**  $g_{lum}$ -factor of dynamic CPL switching during cycling tests under acid and alkaline

condition.
